# Supplementary material
Source: PubMed Central journal article supplement (PMC2893993)
Supplement: E10-01-0050_1.pdf [file E10-01-0050_1.pdf]

## Supplemental Fig. 1

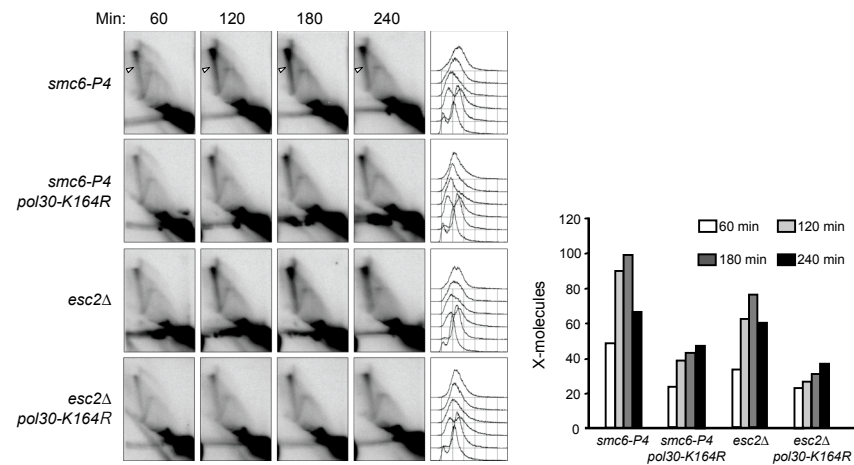

**Supplemental Figure 1. *pol30-K164R* reduces the levels of X-mols in *smc6-P4* and *esc2Δ* cells.**

Experiments were performed as in Figure 3. X-shaped DNA structures are indicated by arrowheads in *smc6-P4*. FACS analyses are presented to the right of the gel image; and displayed from bottom to top are the profiles for asynchronized cultures, G2 arrested cells, released cultures at 60, 120, 180, and 240 minutes. Quantification of the 2D gel results is shown on the right.
